# Supplementary material
Source: PubMed Central journal article supplement (PMC6679718)
Supplement: EMS83586-supplement-3.pdf [file EMS83586-supplement-3.pdf]

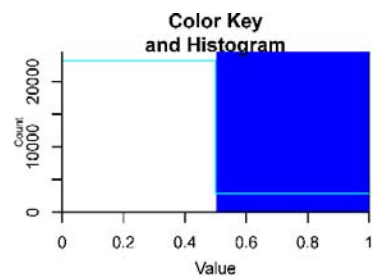

**CCLE mutations**

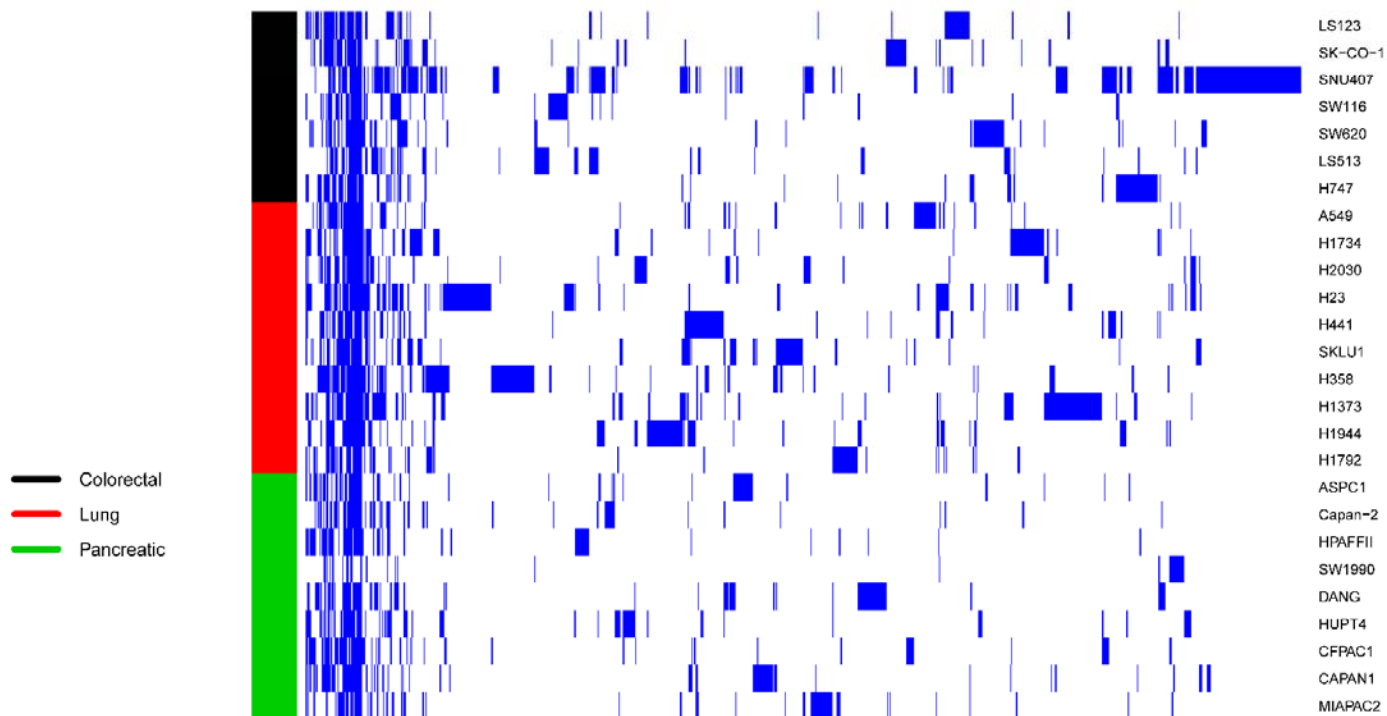

**Supplementary Figure 1**

Hierarchically clustered heat map of mutations in the cell line panel.

Blue = a mutated gene. Cell lines are labelled on the left with their tissue type. CCLE mutational data was not available for COLO678, PANC1, LIM1899 or LIN2099.

**Color Key  
and Histogram**

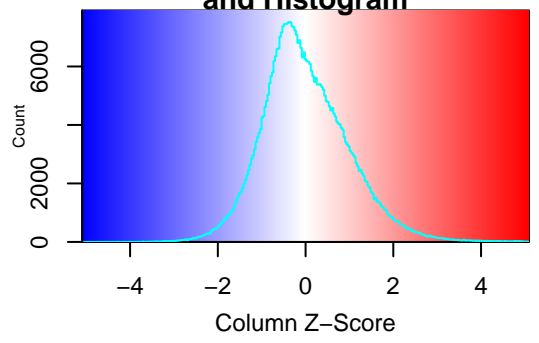

**Baseline mRNA**

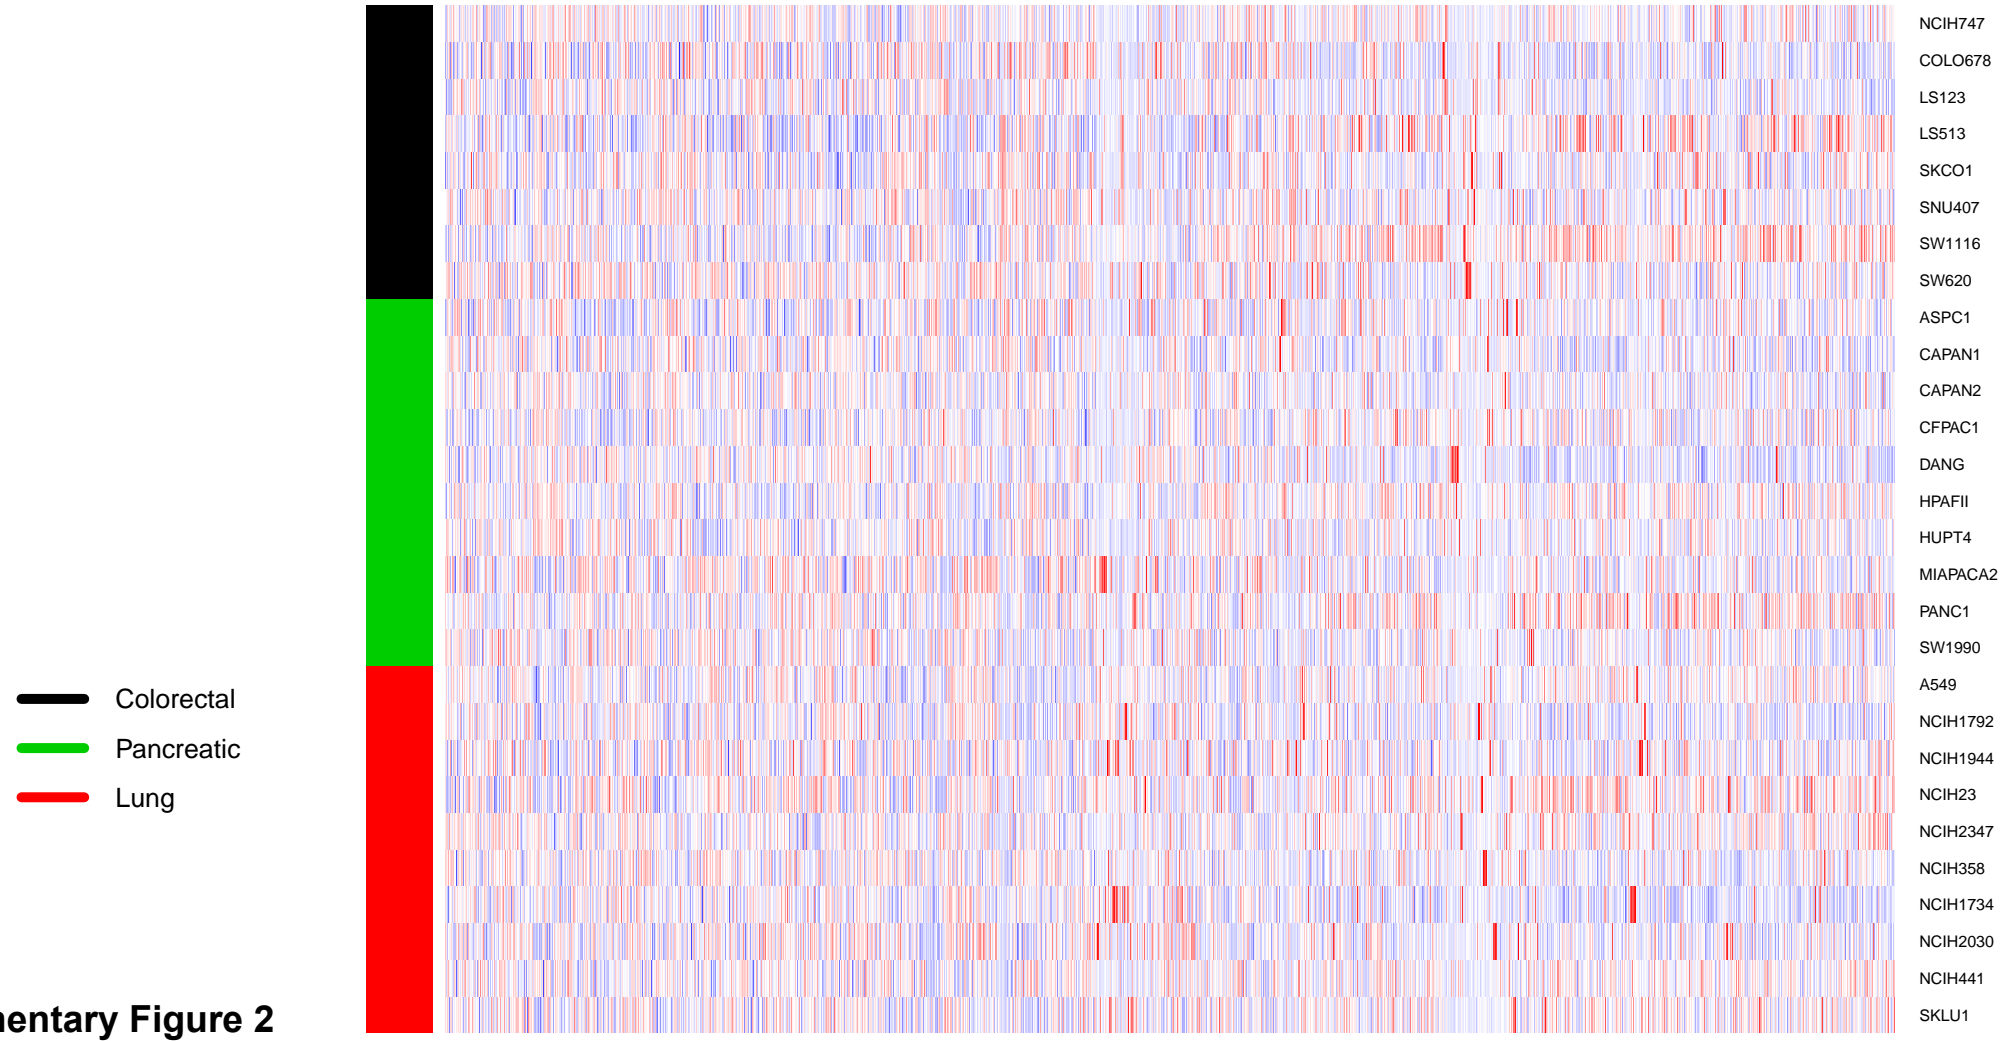

**Supplementary Figure 2**

Heat map of median-centered CCLE cell line basal mRNA.  
Data separated by tissue type annotation. mRNA data was unavailable for LIM-1899 and LIM-2099.

## p-AKT<sup>Ser473</sup> normalized to Total AKT

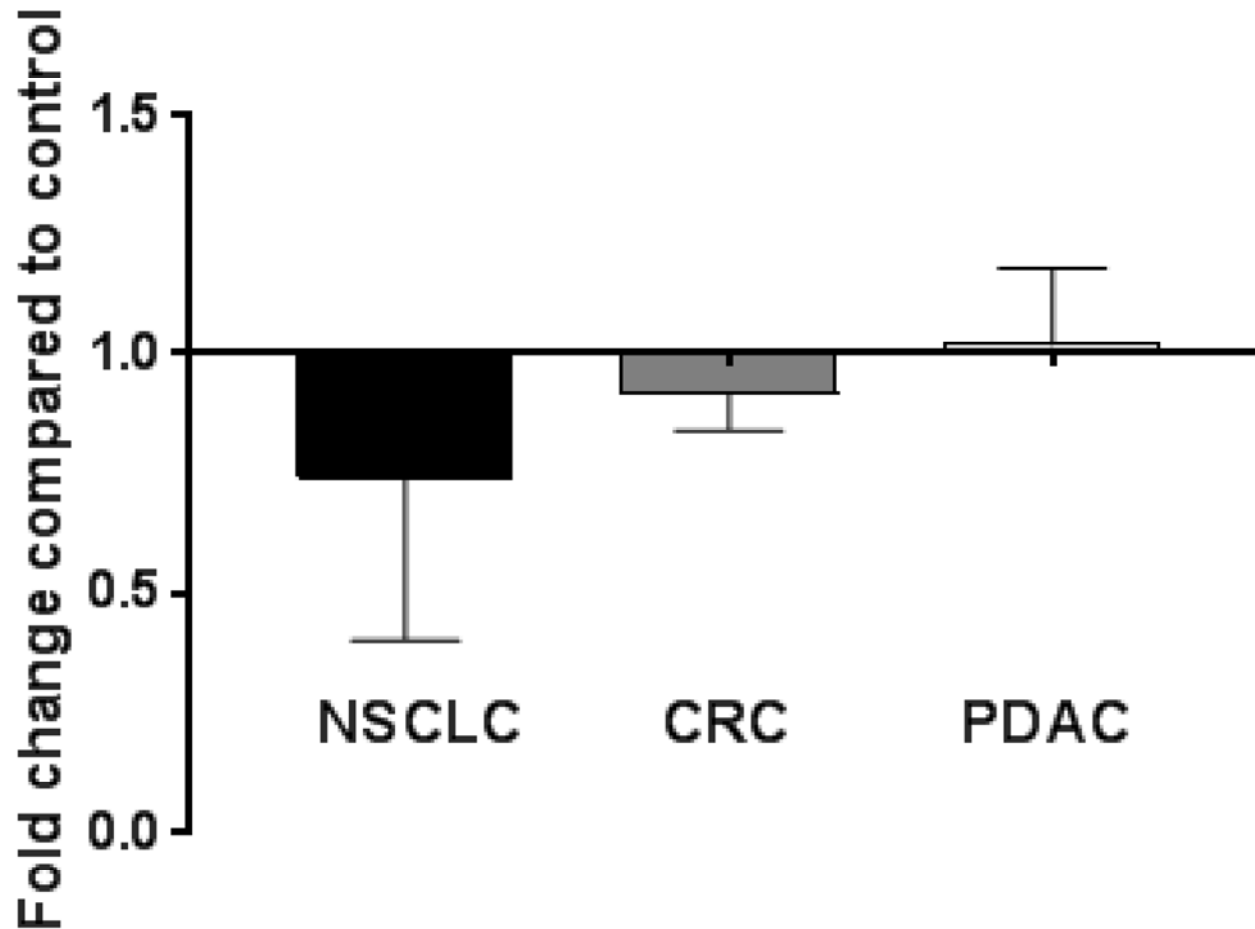

### Supplementary Figure 3

*Changes in p-AKT<sup>Ser473</sup> quantified by ELISA*

Nine KRAS mutated cell lines (same cells as displayed in Figure 4A) were exposed to clinically relevant concentrations of 96.3 nM of pictilisib for 1 hr. The values of p-AKT<sup>Ser473</sup> were normalized to total AKT also quantified by ELISA and done in triplicate. The fold change of treated compared to control is shown in the histogram which represents means and the error bars represent standard deviation.
