# Supplementary material
Source: PubMed Central journal article supplement (PMC6679718)
Supplement: EMS83586-supplement-4.pdf [file EMS83586-supplement-4.pdf]

| Tumour     | Cell line  | AA mutation |
|------------|------------|-------------|
| Colorectal | COLO678    | p.G12D      |
| Colorectal | H747       | p.G13D      |
| Colorectal | LIM-1899   | p.G12A      |
| Colorectal | LIM-2099   | p.G12C      |
| Colorectal | LS123      | p.G12S      |
| Colorectal | LS513      | p.G12D      |
| Colorectal | SK-CO-1    | p.G12V      |
| Colorectal | SNU-407    | p.G12D      |
| Colorectal | SW1116     | p.G12A      |
| Colorectal | SW620      | p.G12V      |
| Lung       | A549       | p.G12S      |
| Lung       | H1373      | p.G12C      |
| Lung       | H1734      | p.G13C      |
| Lung       | H1792      | p.G12C      |
| Lung       | H1944      | p.G13D      |
| Lung       | H2030      | p.G12C      |
| Lung       | H23        | p.G12C      |
| Lung       | H358       | p.G12C      |
| Lung       | H441       | p.G12V      |
| Lung       | SK-LU-1    | p.G12D      |
| Pancreatic | ASPC-1     | p.G12D      |
| Pancreatic | CAPAN-1    | p.G12V      |
| Pancreatic | CAPAN-2    | p.G12V      |
| Pancreatic | CFPAC-1    | p.G12V      |
| Pancreatic | DAN-G      | p.G12V      |
| Pancreatic | HPAF-ii    | p.G12D      |
| Pancreatic | HuP-T4     | p.G12V      |
| Pancreatic | MIA paca-2 | p.G12C      |
| Pancreatic | PANC-1     | p.G12D      |
| Pancreatic | SW1990     | p.G12D      |

### Supplementary Table 1

*KRAS* mutations in colorectal, lung and pancreatic cell lines.

|       |          |             |      |        |       |       |         |        |           |        |
|-------|----------|-------------|------|--------|-------|-------|---------|--------|-----------|--------|
|       | VEGFR1   | VEGFR2      | cKIT | VEGFR3 | MCSFR | TIE2  | TIE1    | PDGFRb | FLT3      | PDGFRa |
| A2780 | 34.8     | 29.4        | 19.2 | 26.0   | 22.9  | 24.8  | 19.9    | 23.1   | 18.8      | 14.3   |
| HT29  | 24.8     | 36.3        | 35.6 | 34.3   | 21.2  | 17.8  | 26.5    | 21.7   | 12.9      | 17.9   |
| H520  | 35.3     | 29.3        | 17.8 | 21.7   | 17.6  | 12.6  | 22.2    | 38.0   | 19.4      | 32.6   |
|       | IGFR1pan | IRpan       | HER3 | HER4   | GAPDH | ATF2  | JNK     | HSP27  | AKT 308   | p38    |
| A2780 | 16.2     | 5.1         | 13.8 | 22.8   | 1.1   | 7.6   | 12.4    | 6.4    | 17.6      | 12.6   |
| HT29  | 15.0     | 18.8        | 13.9 | 24.1   | 1.6   | 18.9  | 18.4    | 28.9   | 39.2      | 16.9   |
| H520  | 16.8     | 7.2         | 8.7  | 21.6   | 1.7   | 14.5  | 20.1    | 18.2   | 23.7      | 10.1   |
|       | SRC      | Total HSP27 | NFkB | GSK3b  | IGFR1 | IRS1  | AKT 473 | mTOR   | p70S6K    | IR     |
| A2780 | 19.3     | 2.9         | 23.8 | 12.7   | 22.4  | 28.1  | 13.2    | 10.2   | 14.0      | 13.4   |
| HT29  | 12.3     | 11.1        | 17.2 | 8.7    | 28.1  | 16.8  | 15.0    | 10.2   | 15.0      | 13.6   |
| H520  | 20.2     | 10.1        | 25.7 | 17.6   | 45.2  | 20.5  | 16.5    | 14.8   | 16.0      | 17.0   |
|       | ERK      | LCK         | p53  | MEK1   | MSK1  | STAT1 | STAT3   | cJUN   | EGFR      | HER2   |
| A2780 | 13.8     | 23.9        | 14.2 | 7.8    | 18.4  | 25.1  | 27.2    | 16.3   | 11.7      | 11.2   |
| HT29  | 19.2     | 18.4        | 26.4 | 7.2    | 19.3  | 37.7  | 27.7    | 12.0   | 24.5      | 11.1   |
| H520  | 12.4     | 14.2        | 21.0 | 8.8    | 13.1  | 24.9  | 12.1    | 16.5   | 31.7      | 13.4   |
|       | PTEN     | GSK3a       | TSC2 | RPS6   | cMET  | CHK1  | cRAF    | Pras40 | B-catenin | CHK2   |
| A2780 | 27.7     | 13.4        | 20.2 | 10.5   | 37.9  | 15.5  | 14.9    | 15.7   | 15.0      | 32.1   |
| HT29  | 16.1     | 12.7        | 16.1 | 12.1   | 16.1  | 24.1  | 16.0    | 27.2   | 32.6      | 25.6   |
| H520  | 18.3     | 27.6        | 27.3 | 25.2   | 39.7  | 25.3  | 21.7    | 22.6   | 16.4      | 16.7   |
|       | AXL      | RET         | FAK  | JAK1   | Rb    |       |         |        |           |        |
| A2780 | 14.5     | 26.0        | 19.5 | 13.8   | 11.4  |       |         |        |           |        |
| HT29  | 6.0      | 29.4        | 8.6  | 12.9   | 11.5  |       |         |        |           |        |
| H520  | 20.5     | 20.5        | 21.6 | 10.8   | 28.8  |       |         |        |           |        |

## Supplementary Table 2

### Assay variability

Coefficient of variance per analyte was calculated across three test cell lines (A2780, HT29 and NCI-H520). Each cell line was run in triplicate and each repetition was run across five separate 96 well plates. All plates were run in a single sitting to avoid inter-daily fluctuations. Values of coefficient of variance are displayed.

| AZD5363   |           | Everolimus |           | Gefitinib |           | Luminespib |           | Pictilisib |           | Trametinib |           | Vemurafenib |           |
|-----------|-----------|------------|-----------|-----------|-----------|------------|-----------|------------|-----------|------------|-----------|-------------|-----------|
| Increased | Decreased | Increased  | Decreased | Increased | Decreased | Increased  | Decreased | Increased  | Decreased | Increased  | Decreased | Increased   | Decreased |
| ERK       | RPS6      |            | p70S6K    | ERK       |           | MEK1       |           | MEK1       | p70S6K    |            |           | ERK         | GSK3B     |
| MEK1      |           |            | RPS6      | MEK1      |           | AKT308     |           |            | RPS6      |            |           | MEK1        | AKT473    |
| AKT473    |           |            |           |           |           |            |           |            |           |            |           | MSK1        | mTOR      |
| AKT308    |           |            |           |           |           |            |           |            |           |            |           |             | TSC2      |
|           |           |            |           |           |           |            |           |            |           |            |           |             | PRAS40    |
|           |           |            |           |           |           |            |           |            |           |            |           |             | p70S6K    |
|           |           |            |           |           |           |            |           |            |           |            |           |             | RPS6      |

### Supplementary Table 3

*Significant changes in phosphoproteins seen in more than 50% of cell lines*

A significant change (either increased or decreased) was defined if the treatment values were above or below 2 standard deviations of the control. The changes in phosphoproteins seen in equal to or more than 50% of the 30 cell lines caused by individual drugs are shown.

|       |         | Pictilisib (nM) | Buparlisib (nM) |
|-------|---------|-----------------|-----------------|
| NSCLC | H1944   | 412             | 825             |
|       | H358    | 1029            | 989             |
|       | H1792   | 959             | 818             |
| PANC  | SW1990  | 909             | 1258            |
|       | CAPAN2  | 1024            | 1399            |
|       | HPAFii  | 737             | 1351            |
| CRC   | COLO678 | 1532            | 1615            |
|       | H747    | 814             | 1242            |
|       | LIM1899 | 710             | 1055            |

**Supplementary Table 4**

The GI<sub>50</sub> concentrations of the two pan-PI3K inhibitors pictilisib and buparlisib used in validation experiments in Figure 4B.
